# Supplementary material
Source: PubMed Central journal article supplement (PMC6415927)

Figure S1

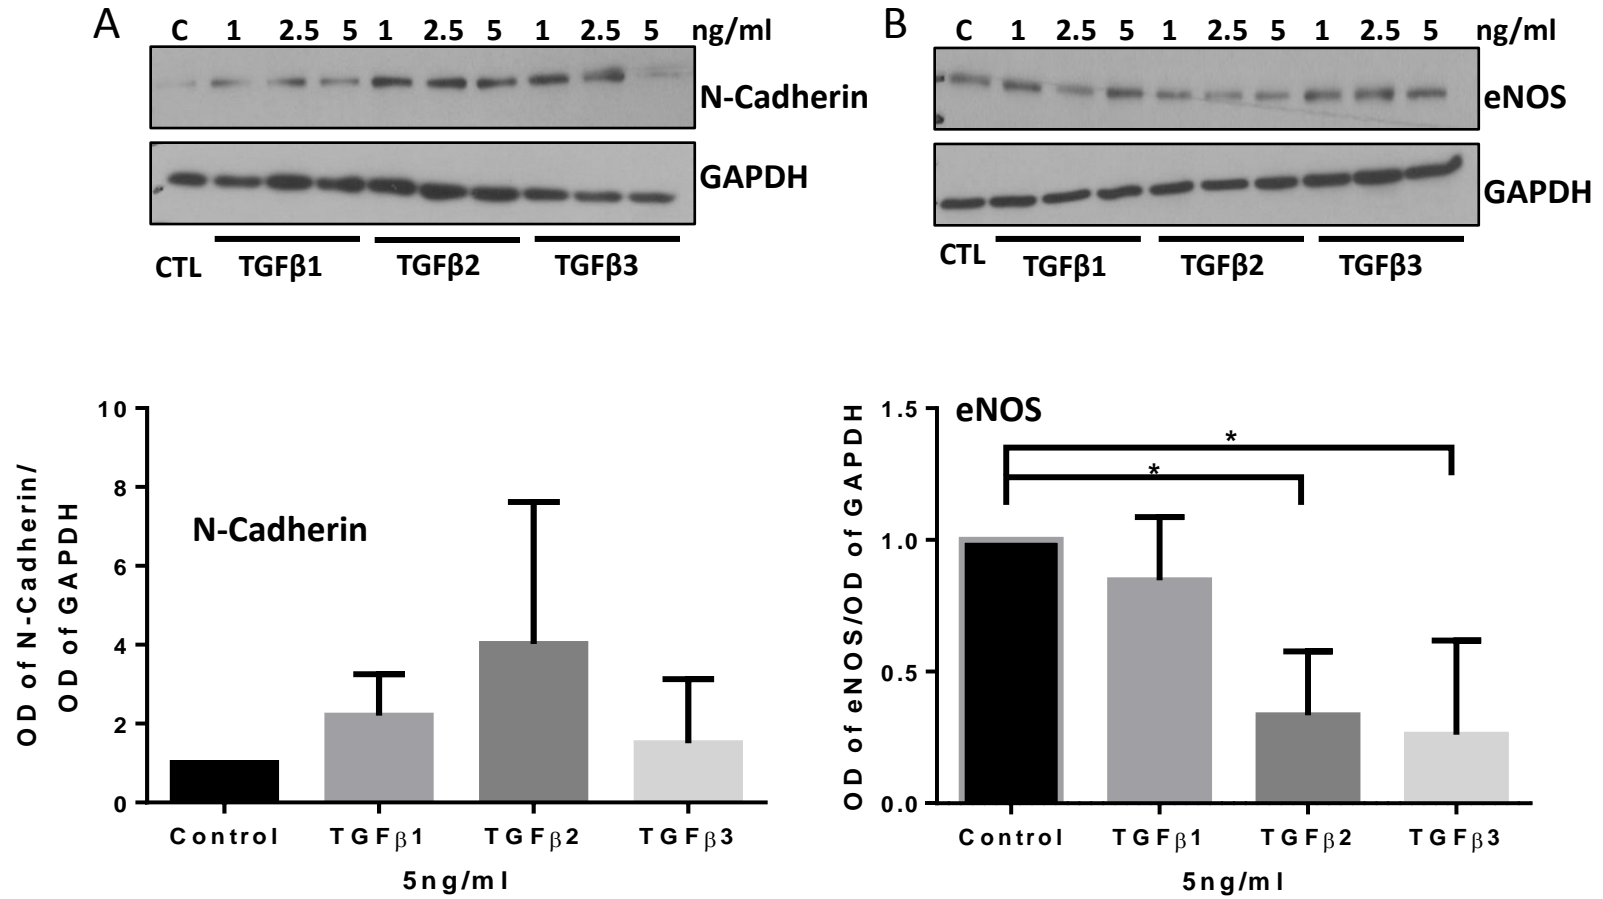

Figure S2

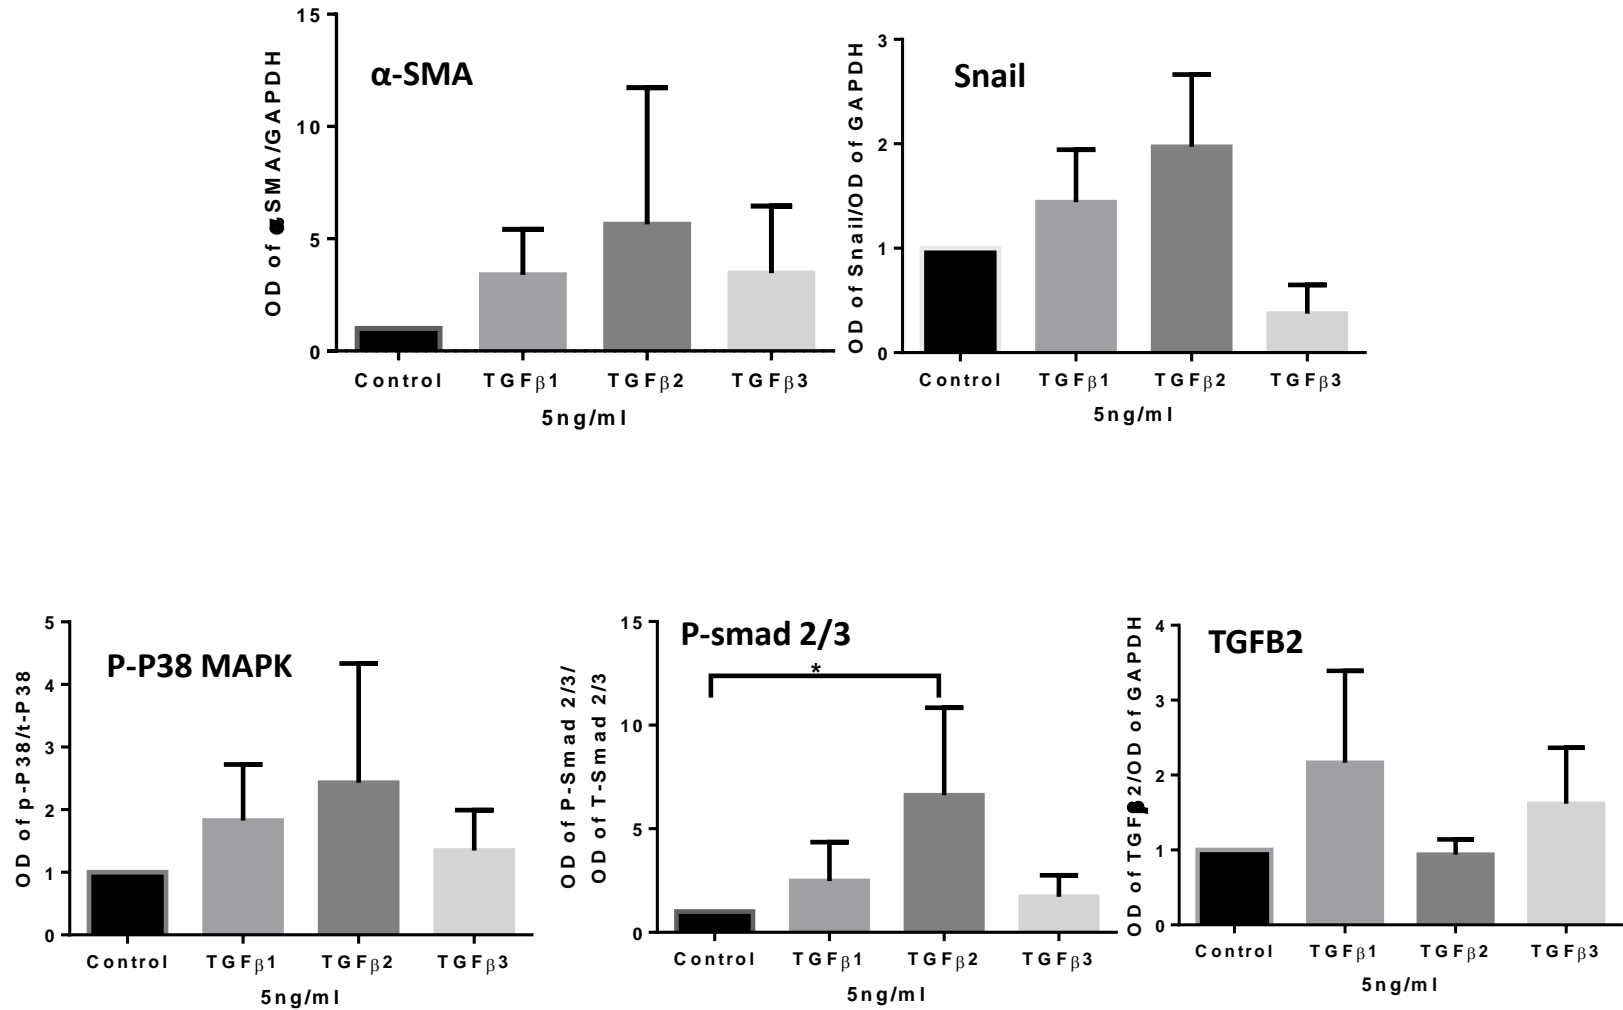

Figure S3

A

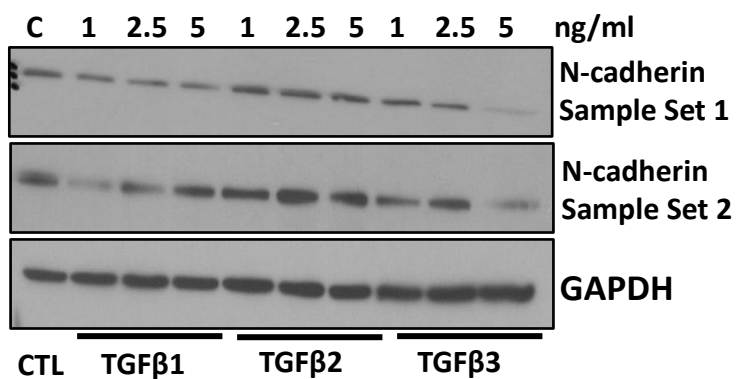

B

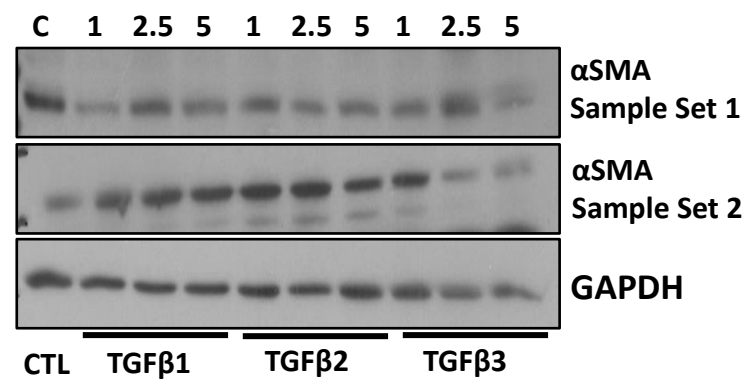

C

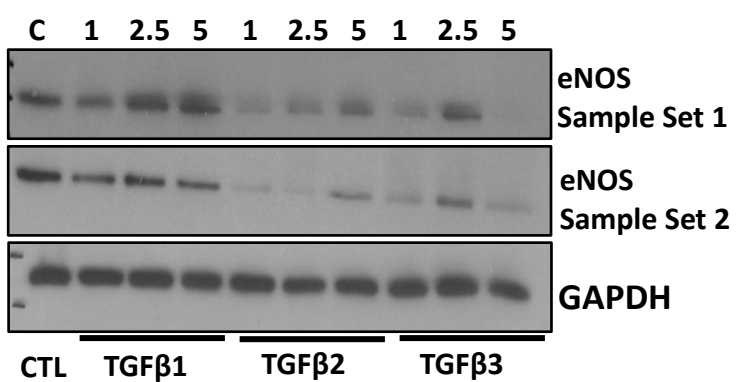

D

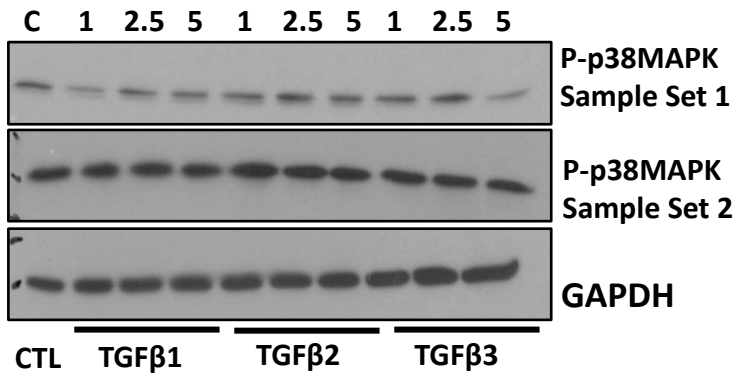

Figure S4

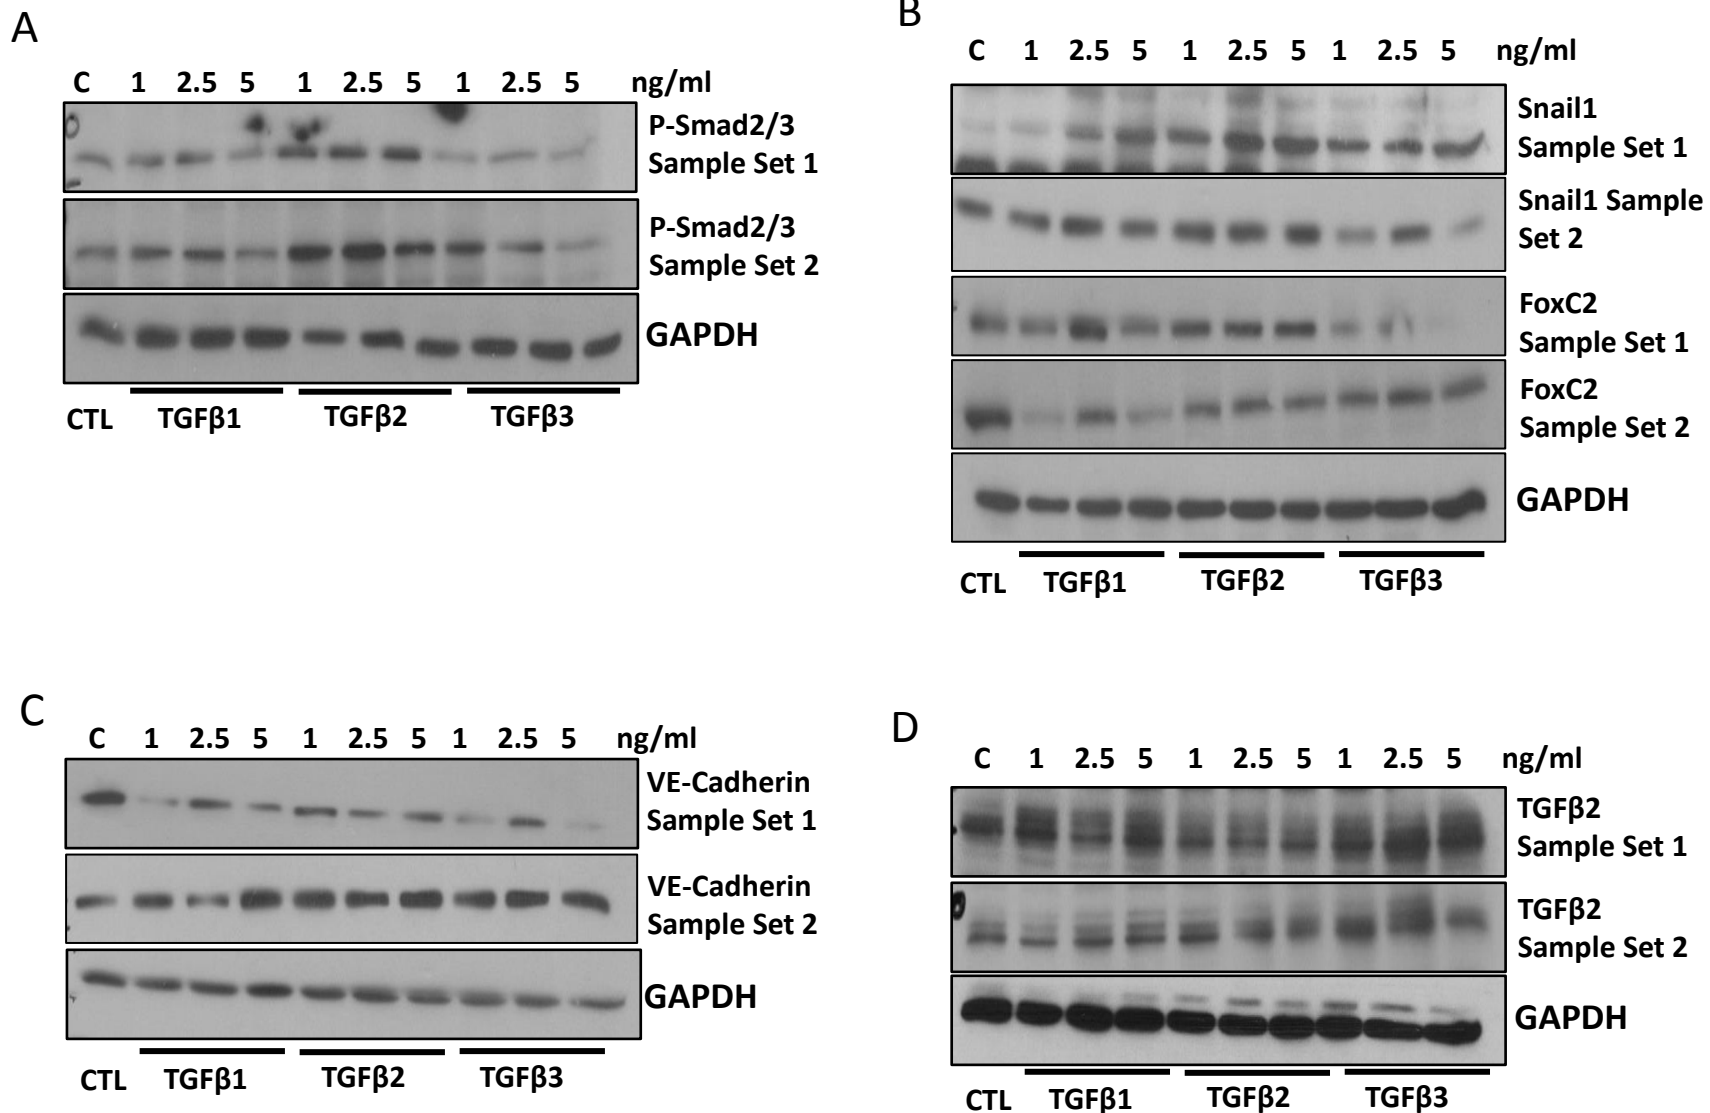

Supplement: NIHMS965282-supplement-Supp_info.pdf [file NIHMS965282-supplement-Supp_info.pdf]
